# Supplementary material for: Optimal arrangements of 1,3-diphenylisobenzofuran molecule pairs for fast singlet fission
Source: Royal Society of Chemistry journal article supplement (doi:10.1039/c9pp00283a), 2019-08-07
Supplement: c9pp00283a1.pdf [file c9pp00283a1.pdf]

## Supporting Information

### Optimal Arrangements of 1,3-Diphenylisobenzofuran Molecule Pairs for Fast

### Singlet Fission

Eric A. Buchanan<sup>†</sup> and Josef Michl<sup>‡¶</sup>

<sup>†</sup> *Department of Chemistry, University of Colorado, Boulder, CO 80309-0215, United States,*

<sup>‡¶</sup> *Institute of Organic Chemistry and Biochemistry, Academy of Sciences of the Czech Republic,*

*Flemingovo nám. 2, 16610 Prague 6, Czech Republic*

#### Table of Contents

|                                                                                     |    |
|-------------------------------------------------------------------------------------|----|
| 1. Symmetrized Rotamer Geometries                                                   | 2  |
| 2. Generation of Pair Coordinates from Structure Parameters                         | 6  |
| 3. Top 67 Pair Structures Parameters for Four Rotamers of 1,3-Diphenylisobenzofuran | 7  |
| 4. Optimized Geometries for Reorganization Energy Calculations                      | 15 |

## 1. Symmetrized Rotamer Geometries

**Table S1.** XYZ Coordinates for **1(C<sub>2</sub>)** in units of Ångström.

35

|   |            |            |            |
|---|------------|------------|------------|
| O | 0.000000   | -0.6883432 | 0.0000000  |
| C | -3.7022031 | -2.5379216 | 0.5387490  |
| C | 3.7022031  | -2.5379216 | -0.5387490 |
| C | -4.8406069 | -1.9068328 | 0.0953780  |
| C | 0.7100903  | 3.8076831  | -0.0000001 |
| C | -4.7672583 | -0.6295796 | -0.4042319 |
| C | -0.7100903 | 3.8076831  | 0.0000001  |
| C | 4.7672583  | -0.6295796 | 0.4042319  |
| C | -2.4848470 | -1.8865396 | 0.5039176  |
| C | 4.8406069  | -1.9068328 | -0.0953780 |
| C | -1.4240502 | 2.6580631  | 0.0000002  |
| C | 2.4848470  | -1.8865396 | -0.5039176 |
| C | 1.4240502  | 2.6580631  | -0.0000002 |
| C | 0.7188995  | 1.4214726  | -0.0000001 |
| C | -3.5518787 | 0.0253856  | -0.4579342 |
| C | -2.3927734 | -0.5930411 | 0.0000004  |
| C | 3.5518787  | 0.0253856  | 0.4579342  |
| C | -1.1155413 | 0.1026812  | 0.0000002  |
| C | 2.3927734  | -0.5930411 | -0.0000004 |
| C | -0.7188995 | 1.4214726  | 0.0000001  |
| C | 1.1155413  | 0.1026812  | -0.0000002 |
| H | -3.7565185 | -3.5463635 | 0.9279490  |
| H | 3.7565185  | -3.5463635 | -0.9279490 |
| H | -5.7935982 | -2.4199217 | 0.1331728  |
| H | 1.2264639  | 4.7591286  | -0.0000002 |
| H | -5.6579643 | -0.1352807 | -0.7706559 |
| H | -1.2264639 | 4.7591286  | 0.0000002  |
| H | 5.6579643  | -0.1352807 | 0.7706559  |
| H | -1.5942178 | -2.3790651 | 0.8674921  |
| H | 5.7935982  | -2.4199217 | -0.1331728 |
| H | -2.5036057 | 2.6774204  | 0.0000004  |
| H | 1.5942178  | -2.3790651 | -0.8674921 |
| H | 2.5036057  | 2.6774204  | -0.0000004 |
| H | -3.4997328 | 1.0128702  | -0.8924179 |
| H | 3.4997328  | 1.0128702  | 0.8924179  |

**Table S2.** XYZ Coordinates for **1**( $C_{2v}$ ) in units of Ångström.

35

|   |            |            |           |
|---|------------|------------|-----------|
| O | 0.0000000  | -0.6883431 | 0.0000000 |
| C | -3.6971879 | -2.5379211 | 0.0000000 |
| C | 3.6971879  | -2.5379211 | 0.0000000 |
| C | -4.8395476 | -1.9068321 | 0.0000000 |
| C | 0.7100611  | 3.8076829  | 0.0000000 |
| C | -4.7707134 | -0.6295791 | 0.0000000 |
| C | -0.7100611 | 3.8076829  | 0.0000000 |
| C | 4.7707134  | -0.6295791 | 0.0000000 |
| C | -2.4801950 | -1.8865391 | 0.0000000 |
| C | 4.8395476  | -1.9068321 | 0.0000000 |
| C | -1.4239920 | 2.6580629  | 0.0000000 |
| C | 2.4801950  | -1.8865391 | 0.0000000 |
| C | 1.4239920  | 2.6580629  | 0.0000000 |
| C | 0.7188697  | 1.4214719  | 0.0000000 |
| C | -3.5558678 | 0.0253849  | 0.0000000 |
| C | -2.3926755 | -0.5930411 | 0.0000000 |
| C | 3.5558678  | 0.0253849  | 0.0000000 |
| C | -1.1154955 | 0.1026809  | 0.0000000 |
| C | 2.3926755  | -0.5930411 | 0.0000000 |
| C | -0.7188697 | 1.4214719  | 0.0000000 |
| C | 1.1154955  | 0.1026809  | 0.0000000 |
| H | -3.7479867 | -3.5463631 | 0.0000000 |
| H | 3.7479867  | -3.5463631 | 0.0000000 |
| H | -5.7921595 | -2.4199211 | 0.0000000 |
| H | 1.2264130  | 4.7591279  | 0.0000000 |
| H | -5.6646914 | -0.1352801 | 0.0000000 |
| H | -1.2264130 | 4.7591279  | 0.0000000 |
| H | 5.6646914  | -0.1352801 | 0.0000000 |
| H | -1.5863197 | -2.3790651 | 0.0000000 |
| H | 5.7921595  | -2.4199211 | 0.0000000 |
| H | -2.5035030 | 2.6774199  | 0.0000000 |
| H | 1.5863197  | -2.3790651 | 0.0000000 |
| H | 2.5035030  | 2.6774199  | 0.0000000 |
| H | -3.5076467 | 1.0128699  | 0.0000000 |
| H | 3.5076467  | 1.0128699  | 0.0000000 |

**Table S3.** XYZ Coordinates for **1(C<sub>s</sub>)** in units of Ångström.

35

|   |            |            |            |
|---|------------|------------|------------|
| O | 0.0000000  | -0.6883430 | 0.0000000  |
| C | -3.7022030 | -2.5379210 | 0.5387490  |
| C | 3.7022030  | -2.5379210 | 0.5387490  |
| C | -4.8406060 | -1.9068320 | 0.0953770  |
| C | 0.7100900  | 3.8076830  | 0.0000000  |
| C | -4.7672580 | -0.6295790 | -0.4042310 |
| C | -0.7100900 | 3.8076830  | 0.0000000  |
| C | 4.7672580  | -0.6295790 | -0.4042310 |
| C | -2.4848460 | -1.8865390 | 0.5039170  |
| C | 4.8406060  | -1.9068320 | 0.0953770  |
| C | -1.4240500 | 2.6580630  | 0.0000000  |
| C | 2.4848460  | -1.8865390 | 0.5039170  |
| C | 1.4240500  | 2.6580630  | 0.0000000  |
| C | 0.7188990  | 1.4214720  | 0.0000000  |
| C | -3.5518780 | 0.0253850  | -0.4579340 |
| C | -2.3927730 | -0.5930410 | 0.0000000  |
| C | 3.5518780  | 0.0253850  | -0.4579340 |
| C | -1.1155410 | 0.1026810  | 0.0000000  |
| C | 2.3927730  | -0.5930410 | 0.0000000  |
| C | -0.7188990 | 1.4214720  | 0.0000000  |
| C | 1.1155410  | 0.1026810  | 0.0000000  |
| H | -3.7565180 | -3.5463630 | 0.9279490  |
| H | 3.7565180  | -3.5463630 | 0.9279490  |
| H | -5.7935980 | -2.4199210 | 0.1331720  |
| H | 1.2264630  | 4.7591280  | 0.0000000  |
| H | -5.6579640 | -0.1352800 | -0.7706550 |
| H | -1.2264630 | 4.7591280  | 0.0000000  |
| H | 5.6579640  | -0.1352800 | -0.7706550 |
| H | -1.5942170 | -2.3790650 | 0.8674920  |
| H | 5.7935980  | -2.4199210 | 0.1331720  |
| H | -2.5036050 | 2.6774200  | 0.0000000  |
| H | 1.5942170  | -2.3790650 | 0.8674920  |
| H | 2.5036050  | 2.6774200  | 0.0000000  |
| H | -3.4997320 | 1.0128700  | -0.8924170 |
| H | 3.4997320  | 1.0128700  | -0.8924170 |

**Table S4.** XYZ Coordinates for **1(C<sub>1</sub>)** in units of Ångström.

35

|   |            |            |            |
|---|------------|------------|------------|
| O | 0.0000000  | -0.6883400 | 0.0000000  |
| C | -3.7450000 | -2.4501400 | 0.4546400  |
| C | 3.6971900  | -2.5379200 | 0.0000000  |
| C | -4.8388100 | -1.9081900 | -0.0070400 |
| C | 0.7100600  | 3.8076800  | 0.0000000  |
| C | -4.7219400 | -0.7191100 | -0.4637000 |
| C | -0.7100600 | 3.8076800  | 0.0000000  |
| C | 4.7707100  | -0.6295800 | 0.0000000  |
| C | -2.5284600 | -1.7979400 | 0.4589000  |
| C | 4.8395500  | -1.9068300 | 0.0000000  |
| C | -1.4239900 | 2.6580600  | 0.0000000  |
| C | 2.4801900  | -1.8865400 | 0.0000000  |
| C | 1.4239900  | 2.6580600  | 0.0000000  |
| C | 0.7188700  | 1.4214700  | 0.0000000  |
| C | -3.5073600 | -0.0636600 | -0.4611900 |
| C | -2.3926800 | -0.5930400 | 0.0000000  |
| C | 3.5558700  | 0.0253800  | 0.0000000  |
| C | -1.1155000 | 0.1026800  | 0.0000000  |
| C | 2.3926800  | -0.5930400 | 0.0000000  |
| C | -0.7188700 | 1.4214700  | 0.0000000  |
| C | 1.1155000  | 0.1026800  | 0.0000000  |
| H | -3.8338000 | -3.3888300 | 0.8159000  |
| H | 3.7479900  | -3.5463600 | 0.0000000  |
| H | -5.7911900 | -2.4216900 | -0.0091800 |
| H | 1.2264100  | 4.7591300  | 0.0000000  |
| H | -5.5779100 | -0.2946000 | -0.8251500 |
| H | -1.2264100 | 4.7591300  | 0.0000000  |
| H | 5.6646900  | -0.1352800 | 0.0000000  |
| H | -1.6725300 | -2.2208100 | 0.8196700  |
| H | 5.7921600  | -2.4199200 | 0.0000000  |
| H | -2.5035000 | 2.6774200  | 0.0000000  |
| H | 1.5863200  | -2.3790700 | 0.0000000  |
| H | 2.5035000  | 2.6774200  | 0.0000000  |
| H | -3.4219000 | 0.8554600  | -0.8152500 |
| H | 3.5076500  | 1.0128700  | 0.0000000  |

## 2. Generation of Pair Coordinates from Structure Parameters

The method of generation of the XYZ coordinates of each pair is described by the following. Partner A is always the same and its coordinates are obtained from Tables S1, S2, S3, or S4 for  $\mathbf{1}(C_2)$ ,  $\mathbf{1}(C_{2v})$ ,  $\mathbf{1}(C_s)$ , and  $\mathbf{1}(C_1)$ . Partner B's coordinates are the obtained by rotation then translation of the coordinates of partner A according to eqs. 1. The XYZ coordinates are stored row-wise as in eq. (1a). The total rotation matrix is the product of the three rotations about the  $x$ ,  $y$ , and  $z$  axes ( $R_{tot} = R_z \cdot R_y \cdot R_x$ ) and it is determined by the three parameters  $R_x$ ,  $R_y$ , and  $R_z$  as defined in eq. (1b). The translation matrix T is determined by the three parameters  $T_x$ ,  $T_y$ , and  $T_z$  and its form is provided in eq. (1c). The XYZ coordinates of partner B store row-wise and are obtained through matrix multiplication of A with the Hermitian conjugate total rotation matrix  $R_{tot}$  followed by addition of the translation matrix T as shown in eq. (1d). There are as many rows in A, B, and T, as there are atoms in the chromophore, 35 for the case of 1,3-diphenylisobenzofuran.

$$A = \begin{pmatrix} x_1 & y_1 & z_1 \\ x_2 & y_2 & z_2 \\ \vdots & \vdots & \vdots \end{pmatrix}; B = \begin{pmatrix} x_1 & y_1 & z_1 \\ x_2 & y_2 & z_2 \\ \vdots & \vdots & \vdots \end{pmatrix} \quad (1a)$$

$$R_{tot} = \begin{pmatrix} \cos(R_y)\cos(R_z) & -\cos(R_z)\sin(R_x)\sin(R_y) - \cos(R_x)\sin(R_z) & -\cos(R_x)\cos(R_z)\sin(R_y) + \sin(R_x)\sin(R_z) \\ \cos(R_y)\sin(R_z) & \cos(R_x)\cos(R_z) - \sin(R_x)\sin(R_y)\sin(R_z) & -\cos(R_z)\sin(R_x) - \cos(R_x)\sin(R_y)\sin(R_z) \\ \sin(R_y) & \cos(R_y)\sin(R_x) & \cos(R_x)\cos(R_y) \end{pmatrix} \quad (1b)$$

$$T = \begin{pmatrix} T_x & T_y & T_z \\ T_x & T_y & T_z \\ \vdots & \vdots & \vdots \end{pmatrix} \quad (1c)$$

$$B = A \cdot R_{tot}^\dagger + T \quad (1d)$$

### 3. Top 67 Pair Structures for 4 Rotamers of 1,3-Diphenylisobenzofuran

**Table S5.** Pair Structure Parameters for  $1(C_2)$  Pairs 1-34.<sup>a</sup>

| Pair | T <sub>Z</sub> | T <sub>Y</sub> | T <sub>X</sub> | R <sub>Z</sub> | R <sub>Y</sub> | R <sub>X</sub> | $\Delta E_{DS}^b$ | $\Delta E_{BB}^c$ | $k/k_0^d$ |
|------|----------------|----------------|----------------|----------------|----------------|----------------|-------------------|-------------------|-----------|
| 1    | 3.49           | 1.45           | 2.11           | 68.08          | 179.60         | 0.58           | 51.3              | 34.7              | 4306      |
| 2    | 4.00           | -0.39          | -2.00          | 248.95         | 193.73         | 160.11         | 42.5              | 37.6              | 2944      |
| 3    | 3.93           | 1.77           | -1.89          | 107.84         | 174.72         | 172.76         | 27.4              | 24.6              | 2261      |
| 4    | 4.28           | -1.27          | -1.42          | 81.89          | 165.69         | 13.89          | 25.4              | 30.1              | 896       |
| 5    | 4.00           | 1.65           | -2.57          | 127.80         | -4.37          | 188.90         | 51.4              | 26.8              | 892       |
| 6    | 3.98           | -0.09          | -2.25          | 79.24          | 168.15         | 17.30          | 4.3               | 29.0              | 806       |
| 7    | 3.40           | -2.59          | 4.71           | 63.41          | 202.54         | 0.07           | 5.4               | 23.6              | 717       |
| 8    | 3.80           | 5.27           | 0.17           | 96.43          | 9.33           | 197.91         | 9.3               | 20.8              | 546       |
| 9    | 3.55           | -2.17          | 4.46           | 101.22         | 199.87         | 14.64          | 3.4               | 20.3              | 536       |
| 10   | 3.94           | 3.51           | 2.33           | -2.45          | 193.37         | 176.54         | 143.9             | 23.9              | 504       |
| 11   | 3.72           | 5.46           | 0.29           | 102.04         | 10.42          | 201.27         | 27.4              | 22.6              | 499       |
| 12   | 3.03           | -0.23          | -5.84          | 101.40         | -22.06         | 174.04         | 18.7              | 22.3              | 494       |
| 13   | 3.70           | 1.35           | 2.50           | 50.42          | 178.00         | 4.24           | 90.7              | 27.2              | 441       |
| 14   | 3.27           | 4.94           | 1.52           | 78.06          | 169.03         | 2.29           | 60.0              | 16.0              | 418       |
| 15   | 3.08           | 5.82           | 0.13           | 88.62          | 168.62         | -2.85          | 34.5              | 13.5              | 354       |
| 16   | 3.40           | 1.43           | -4.86          | 89.72          | -0.80          | 179.33         | 125.5             | 20.2              | 338       |
| 17   | 3.09           | 5.79           | 0.32           | 263.76         | 191.48         | 187.52         | 32.8              | 12.9              | 336       |
| 18   | 3.11           | -2.75          | 3.35           | 121.96         | 192.22         | 201.84         | 54.1              | 6.3               | 316       |
| 19   | 3.39           | 4.64           | -1.98          | 128.21         | -5.17          | 186.26         | 3.4               | 12.0              | 304       |
| 20   | 3.60           | 3.22           | 0.21           | 95.68          | 171.33         | 176.50         | 22.2              | 14.4              | 259       |
| 21   | 3.71           | 2.98           | -0.61          | 117.31         | 176.13         | 10.27          | 129.0             | 12.6              | 250       |
| 22   | 3.92           | 0.15           | -4.49          | 108.85         | -0.07          | 187.25         | 55.7              | 11.5              | 238       |
| 23   | 3.95           | -0.05          | 3.76           | 43.51          | 186.18         | 7.09           | 2.2               | 12.2              | 239       |
| 24   | 4.21           | 0.33           | -3.92          | 131.36         | 1.67           | 191.97         | 22.0              | 9.6               | 226       |
| 25   | 2.91           | 3.26           | -3.60          | 146.67         | 338.63         | 181.52         | 0.7               | 9.8               | 204       |
| 26   | 4.43           | -0.40          | -3.57          | 141.15         | 192.58         | 166.69         | 3.6               | 9.6               | 201       |
| 27   | 3.74           | 1.98           | -1.33          | 103.40         | 170.46         | 13.60          | 29.3              | 10.0              | 187       |
| 28   | 3.10           | 2.53           | -3.56          | 12.82          | 191.75         | 193.27         | 152.4             | 16.9              | 182       |
| 29   | 2.96           | 1.76           | -3.65          | 168.68         | 165.20         | -13.35         | 134.9             | 7.8               | 174       |
| 30   | 4.18           | -0.05          | 4.28           | 19.72          | 11.87          | 192.64         | 18.9              | 6.9               | 168       |
| 31   | 4.31           | -0.06          | 4.23           | 20.86          | 15.07          | 196.68         | 14.6              | 5.8               | 163       |
| 32   | 4.30           | -0.06          | 4.24           | 20.76          | 14.65          | 196.14         | 15.2              | 5.9               | 163       |
| 33   | 3.78           | 0.06           | 2.78           | 269.66         | 180.29         | 174.91         | 4.3               | 12.6              | 138       |
| 34   | 4.41           | -2.42          | -2.24          | 261.87         | 195.38         | 167.53         | 69.6              | 10.8              | 133       |

<sup>a</sup> Translations in units of Ångström, rotations in units of degree, and energies in units of meV. <sup>b</sup> Davydov splitting  $\Delta E_{DS} = E(S^{**}) - E(S^*)$ . <sup>c</sup> Biexciton binding energy. <sup>d</sup>  $k_0 = 1.05 \times 10^8 \text{ s}^{-1}$ .

**Table S6.** Pair Structure Parameters for  $1(C_2)$  Pairs 35-67.<sup>a</sup>

| Pair | T <sub>Z</sub> | T <sub>Y</sub> | T <sub>X</sub> | R <sub>Z</sub> | R <sub>Y</sub> | R <sub>X</sub> | $\Delta E_{DS}^b$ | $\Delta E_{BB}^c$ | $k/k_0^d$ |
|------|----------------|----------------|----------------|----------------|----------------|----------------|-------------------|-------------------|-----------|
| 35   | 3.95           | -0.98          | -2.60          | 126.74         | 179.26         | 172.16         | 143.7             | 16.8              | 132       |
| 36   | 2.95           | 2.05           | -4.56          | 2.22           | 14.85          | 167.49         | 55.0              | 9.8               | 126       |
| 37   | 2.56           | -3.66          | 2.48           | 108.36         | 21.51          | 164.67         | 6.0               | 8.4               | 125       |
| 38   | 3.74           | -0.16          | 2.67           | 125.01         | -0.93          | -0.42          | 118.8             | 8.3               | 121       |
| 39   | 3.34           | -0.41          | -4.62          | 1.99           | 8.64           | 158.98         | 52.8              | 8.7               | 114       |
| 40   | 2.69           | -3.49          | 2.63           | 110.91         | 199.42         | 198.29         | 8.3               | 7.2               | 113       |
| 41   | 4.34           | 0.86           | 3.42           | -6.25          | 194.89         | 166.03         | 73.9              | 7.8               | 110       |
| 42   | 3.60           | 1.79           | 2.27           | 276.56         | 187.26         | 179.25         | 74.3              | 10.0              | 109       |
| 43   | 4.06           | 2.47           | 0.96           | 284.59         | 181.04         | 167.16         | 108.5             | 13.1              | 104       |
| 44   | 3.97           | 2.51           | 1.02           | 103.85         | 358.96         | -11.17         | 109.2             | 13.1              | 103       |
| 45   | 3.33           | -2.36          | 3.75           | 167.99         | 176.37         | 23.25          | 90.8              | 3.9               | 101       |
| 46   | 3.16           | 4.72           | -2.79          | 16.97          | 192.14         | 182.81         | 172.9             | 8.8               | 97        |
| 47   | 4.24           | -0.54          | 4.23           | 141.59         | 5.92           | 335.42         | 51.4              | 7.1               | 96        |
| 48   | 3.60           | 5.26           | 0.55           | 30.96          | 188.18         | 180.40         | 153.9             | 11.1              | 95        |
| 49   | 3.72           | -0.79          | 3.03           | 58.57          | 193.24         | 2.00           | 53.5              | 9.1               | 94        |
| 50   | 4.38           | -0.76          | -2.08          | 87.43          | -16.82         | -17.58         | 61.8              | 18.2              | 92        |
| 51   | 3.61           | 5.26           | 0.56           | 25.20          | 190.05         | 180.89         | 161.2             | 10.0              | 93        |
| 52   | 3.26           | 3.88           | -3.88          | 36.32          | 185.06         | 182.56         | 146.0             | 11.7              | 93        |
| 53   | 3.49           | 3.03           | -0.96          | 64.96          | 179.99         | 181.83         | 229.5             | 20.0              | 91        |
| 54   | 4.08           | -0.64          | -1.68          | 72.83          | -3.20          | 188.71         | 82.3              | 6.4               | 84        |
| 55   | 4.00           | -0.75          | -1.98          | 68.19          | 178.19         | 170.26         | 97.4              | 4.3               | 82        |
| 56   | 3.85           | 0.93           | 2.57           | 263.45         | 180.84         | 173.98         | 24.5              | 4.9               | 76        |
| 57   | 3.64           | 2.22           | -4.16          | 150.87         | -7.58          | 189.38         | 17.5              | 4.2               | 76        |
| 58   | 3.46           | -0.32          | -3.91          | 201.90         | 177.26         | 164.61         | 103.1             | 4.5               | 75        |
| 59   | 4.51           | 1.01           | 1.84           | 84.91          | 2.71           | 343.28         | 11.5              | 4.5               | 72        |
| 60   | 4.23           | -2.07          | -3.70          | 192.41         | 174.20         | 155.49         | 98.5              | 7.2               | 71        |
| 61   | 4.20           | 2.35           | 1.34           | 274.50         | 191.66         | 169.21         | 34.8              | 3.1               | 70        |
| 62   | 4.14           | 2.43           | 1.18           | 274.72         | 189.80         | 169.08         | 38.8              | 3.3               | 69        |
| 63   | 4.29           | 6.14           | 3.04           | 52.02          | 199.77         | 151.00         | 12.2              | 4.7               | 63        |
| 64   | 3.73           | -0.67          | 1.95           | 108.60         | 183.77         | 201.42         | 98.5              | 8.7               | 60        |
| 65   | 3.10           | 7.34           | -2.33          | 1.89           | 6.57           | 176.58         | 84.2              | 3.9               | 59        |
| 66   | 4.58           | -0.84          | 1.17           | 120.84         | -14.53         | -6.31          | 97.6              | 9.9               | 58        |
| 67   | 3.50           | 2.98           | 1.48           | 251.52         | 188.47         | 184.04         | 14.1              | 4.7               | 57        |

<sup>a</sup> Translations in units of Ångström, rotations in units of degree, and energies in units of meV. <sup>b</sup> Davydov splitting  $\Delta E_{DS} = E(S^{**}) - E(S^*)$ . <sup>c</sup> Biexciton binding energy. <sup>d</sup>  $k_0 = 1.05 \times 10^8 \text{ s}^{-1}$ .



**Table S7.** Pair Structure Parameters for **1(C<sub>2v</sub>)** Pairs 1-34.<sup>a</sup>

| Pair | T <sub>Z</sub> | T <sub>Y</sub> | T <sub>X</sub> | R <sub>Z</sub> | R <sub>Y</sub> | R <sub>X</sub> | $\Delta E_{DS}^b$ | $\Delta E_{BB}^c$ | $k/k_0^d$ |
|------|----------------|----------------|----------------|----------------|----------------|----------------|-------------------|-------------------|-----------|
| 1    | 3.46           | 1.28           | 2.00           | 64.92          | -0.17          | -0.26          | 78.7              | 75.3              | 16422     |
| 2    | 3.49           | 1.19           | 2.56           | 48.77          | -0.42          | -0.93          | 69.3              | 54.4              | 2273      |
| 3    | 3.50           | -1.10          | 1.48           | 104.39         | -0.69          | 180.89         | 8.2               | 34.4              | 1927      |
| 4    | 3.48           | 1.35           | 0.94           | 82.36          | 0.09           | 180.44         | 16.1              | 27.8              | 1625      |
| 5    | 3.46           | 3.33           | 2.78           | -2.83          | -0.33          | 180.15         | 147.6             | 42.7              | 1539      |
| 6    | 3.38           | 5.42           | 0.20           | 86.56          | -0.20          | -2.13          | 35.3              | 28.0              | 1469      |
| 7    | 3.36           | -0.28          | 4.12           | 40.40          | -2.50          | 0.71           | 10.8              | 25.0              | 1419      |
| 8    | 3.44           | 1.10           | 4.81           | 86.41          | -1.38          | -0.02          | 96.2              | 28.3              | 988       |
| 9    | 3.43           | -2.05          | 0.71           | 90.83          | 1.08           | 180.13         | 67.1              | 28.3              | 772       |
| 10   | 3.45           | 2.79           | 0.06           | 93.81          | -0.56          | 179.63         | 34.3              | 23.1              | 714       |
| 11   | 3.33           | 4.65           | 1.88           | 74.78          | -2.40          | 178.71         | 34.7              | 19.9              | 598       |
| 12   | 3.48           | 1.35           | 2.63           | 123.30         | -0.19          | 0.25           | 208.2             | 30.2              | 494       |
| 13   | 3.47           | 1.25           | 3.75           | 0.00           | 0.00           | 180.00         | 79.8              | 9.2               | 461       |
| 14   | 3.38           | 4.17           | 2.40           | 41.27          | -1.31          | -0.80          | 20.5              | 11.8              | 398       |
| 15   | 3.41           | 4.30           | 2.17           | 50.44          | 359.31         | -0.68          | 5.4               | 9.7               | 380       |
| 16   | 3.44           | 2.67           | 3.09           | 4.88           | -0.50          | 180.10         | 109.4             | 19.9              | 377       |
| 17   | 3.49           | -1.17          | 2.84           | 54.45          | 0.39           | -0.47          | 176.8             | 28.1              | 332       |
| 18   | 3.44           | 3.04           | 1.69           | 32.35          | -0.24          | 180.14         | 172.1             | 19.9              | 252       |
| 19   | 3.48           | -1.66          | 4.00           | 158.61         | -0.63          | -0.64          | 12.4              | 10.6              | 243       |
| 20   | 3.49           | 2.62           | 0.89           | 107.35         | 0.11           | -0.19          | 181.4             | 23.7              | 238       |
| 21   | 3.48           | 0.11           | 2.80           | 152.45         | 0.09           | -0.33          | 157.8             | 24.3              | 236       |
| 22   | 3.47           | -1.44          | 4.08           | 0.00           | 0.00           | 180.00         | 65.4              | 6.3               | 212       |
| 23   | 3.49           | 1.28           | 3.02           | 37.09          | 0.40           | 179.96         | 77.5              | 13.6              | 212       |
| 24   | 3.48           | -1.51          | 4.06           | 137.76         | -0.60          | 181.55         | 7.8               | 3.6               | 201       |
| 25   | 3.46           | -0.28          | 2.88           | 168.99         | 0.01           | 179.93         | 153.5             | 22.4              | 198       |
| 26   | 3.43           | 1.50           | 3.43           | 29.34          | -0.53          | -0.09          | 18.1              | 10.6              | 193       |
| 27   | 3.63           | 2.48           | 2.07           | 106.00         | 167.76         | -2.43          | 108.0             | 14.6              | 132       |
| 28   | 3.50           | -0.59          | 3.36           | 154.93         | -1.12          | 185.05         | 100.1             | 9.2               | 117       |
| 29   | 3.51           | 1.48           | 2.13           | 273.30         | 3.10           | 175.34         | 76.1              | 6.8               | 113       |
| 30   | 3.48           | -2.59          | 3.34           | 124.49         | 0.49           | 179.40         | 24.2              | 6.2               | 113       |
| 31   | 3.86           | 3.11           | 1.30           | 87.66          | 158.33         | -0.94          | 11.4              | 6.5               | 111       |
| 32   | 3.23           | 4.63           | 2.73           | -18.19         | -9.59          | 177.66         | 193.2             | 9.7               | 107       |
| 33   | 3.46           | -1.54          | 3.03           | 85.96          | 0.52           | 178.87         | 114.0             | 11.9              | 106       |
| 34   | 4.46           | 1.82           | 1.22           | 97.57          | 180.20         | 17.96          | 56.9              | 7.4               | 102       |

<sup>a</sup> Translations in units of Ångström, rotations in units of degree, and energies in units of meV. <sup>b</sup> Davydov splitting  $\Delta E_{DS} = E(S^{**}) - E(S^*)$ . <sup>c</sup> Biexciton binding energy. <sup>d</sup>  $k_0 = 1.05 \times 10^8 \text{ s}^{-1}$ .

**Table S8.** Pair Structure Parameters for **1(C<sub>2v</sub>)** Pairs 35-67.<sup>a</sup>

| Pair | T <sub>Z</sub> | T <sub>Y</sub> | T <sub>X</sub> | R <sub>Z</sub> | R <sub>Y</sub> | R <sub>X</sub> | $\Delta E_{DS}^b$ | $\Delta E_{BB}^c$ | $k/k_0^d$ |
|------|----------------|----------------|----------------|----------------|----------------|----------------|-------------------|-------------------|-----------|
| 35   | 4.30           | 2.63           | 1.29           | 98.46          | 165.87         | 12.20          | 42.6              | 4.4               | 101       |
| 36   | 3.08           | 7.25           | 2.67           | 173.24         | 8.19           | 3.28           | 88.6              | 5.6               | 95        |
| 37   | 3.44           | 7.25           | 2.01           | 0.00           | 0.00           | 180.00         | 89.8              | 5.2               | 94        |
| 38   | 3.60           | 7.27           | 1.68           | 3.10           | 4.21           | 181.52         | 89.5              | 5.3               | 94        |
| 39   | 3.90           | 0.46           | 2.63           | 77.13          | 180.30         | 6.51           | 16.2              | 5.1               | 88        |
| 40   | 4.58           | 6.87           | 2.85           | 144.65         | -0.32          | -17.44         | 86.9              | 5.9               | 66        |
| 41   | 3.54           | -2.95          | 2.05           | 153.30         | -0.88          | 181.79         | 173.1             | 9.4               | 62        |
| 42   | 2.63           | 3.99           | 5.58           | 85.81          | -10.77         | 8.91           | 157.4             | 7.3               | 60        |
| 43   | 3.36           | 8.37           | -0.75          | 180.06         | 180.01         | 0.05           | 76.1              | 4.0               | 60        |
| 44   | 4.23           | 1.52           | 4.21           | 136.45         | 176.24         | 11.84          | 52.7              | 6.2               | 59        |
| 45   | 3.77           | 5.91           | 3.63           | 99.69          | 1.16           | -6.03          | 131.9             | 6.9               | 56        |
| 46   | 4.61           | -2.34          | 0.10           | 61.60          | -19.25         | -14.82         | 151.6             | 7.0               | 50        |
| 47   | 3.98           | -2.62          | 0.61           | 77.21          | -8.75          | -6.88          | 124.3             | 5.7               | 48        |
| 48   | 3.21           | 6.53           | 3.61           | 0.00           | 0.00           | 180.00         | 66.0              | 1.8               | 35        |
| 49   | 2.85           | 7.02           | 2.34           | 152.90         | -0.20          | 8.97           | 102.6             | 9.2               | 32        |
| 50   | 4.27           | 6.21           | 3.09           | 56.37          | 13.24          | 189.08         | 26.0              | 3.4               | 32        |
| 51   | 4.29           | -2.50          | 0.80           | 134.09         | 168.22         | 169.22         | 174.8             | 5.3               | 32        |
| 52   | 3.49           | 0.48           | 4.46           | 149.54         | 0.10           | -0.67          | 0.4               | 4.2               | 31        |
| 53   | 2.58           | 7.11           | 2.41           | 98.83          | 158.78         | 0.55           | 82.1              | 4.6               | 28        |
| 54   | 3.84           | -3.74          | 1.19           | 121.40         | 174.62         | 174.50         | 85.8              | 6.3               | 27        |
| 55   | 3.99           | 3.55           | 4.27           | 46.86          | 172.74         | 15.27          | 54.1              | 3.7               | 25        |
| 56   | 3.47           | 0.73           | 3.68           | 123.49         | -0.43          | 183.17         | 97.8              | 2.8               | 24        |
| 57   | 3.61           | 3.97           | 0.54           | 38.31          | -4.45          | 184.90         | 193.5             | 8.8               | 20        |
| 58   | 3.27           | 3.04           | 2.80           | 144.74         | 2.99           | 191.60         | 226.8             | 7.4               | 16        |
| 59   | 3.90           | -3.65          | 1.49           | 163.01         | -5.83          | 186.27         | 197.2             | 6.5               | 12        |
| 60   | 3.48           | -1.26          | 2.72           | 40.94          | 0.02           | 179.85         | 218.9             | 5.5               | 9         |
| 61   | 4.24           | 1.75           | 3.61           | 54.04          | 179.84         | 11.97          | 20.6              | 1.6               | 7         |
| 62   | 3.54           | -3.64          | 2.58           | 43.28          | -1.16          | -0.78          | 225.7             | 8.6               | 4         |
| 63   | 3.15           | 4.89           | 1.88           | 59.03          | 151.61         | 166.60         | 18.8              | 1.0               | 4         |
| 64   | 3.50           | 3.44           | 0.54           | 0.00           | 0.00           | 180.00         | 296.0             | 1.9               | 2         |
| 65   | 4.92           | -1.16          | 0.93           | 156.54         | 22.18          | 202.06         | 253.2             | 2.7               | 1         |
| 66   | 4.67           | -0.16          | 0.41           | 152.39         | 17.10          | 197.31         | 288.8             | 9.8               | 7         |
| 67   | 3.50           | -0.39          | 0.83           | 16.63          | -0.69          | 177.48         | 473.3             | 9.2               | 1         |

<sup>a</sup> Translations in units of Ångström, rotations in units of degree, and energies in units of meV. <sup>b</sup> Davydov splitting  $\Delta E_{DS} = E(S^{**}) - E(S^*)$ . <sup>c</sup> Biexciton binding energy. <sup>d</sup>  $k_0 = 1.05 \times 10^8 \text{ s}^{-1}$ .

**Table S9.** Pair Structure Parameters for **1(C<sub>s</sub>)** Pairs 1-34.<sup>a</sup>

| Pair | T <sub>Z</sub> | T <sub>Y</sub> | T <sub>X</sub> | R <sub>Z</sub> | R <sub>Y</sub> | R <sub>X</sub> | $\Delta E_{DS}^b$ | $\Delta E_{BB}^c$ | $k/k_0^d$ |
|------|----------------|----------------|----------------|----------------|----------------|----------------|-------------------|-------------------|-----------|
| 1    | -3.46          | 1.30           | 1.93           | 66.79          | 180.40         | -0.61          | 70.5              | 45.9              | 5998      |
| 2    | 3.53           | 1.55           | 1.73           | 242.59         | 183.68         | 179.27         | 93.6              | 46.2              | 3473      |
| 3    | 4.00           | -0.39          | 1.98           | 290.89         | 193.66         | 19.73          | 44.8              | 36.8              | 3126      |
| 4    | 4.02           | 1.71           | 1.82           | 71.41          | 177.99         | 9.33           | 32.2              | 22.3              | 1805      |
| 5    | 3.97           | -0.11          | 2.31           | 279.25         | 191.79         | 16.73          | 15.3              | 29.5              | 901       |
| 6    | 3.60           | 1.45           | -2.58          | -50.37         | 3.23           | -2.59          | 63.4              | 33.2              | 808       |
| 7    | -3.38          | -2.61          | 4.69           | 63.24          | 157.38         | 0.08           | 4.4               | 23.2              | 766       |
| 8    | 3.20           | 5.46           | 1.03           | 247.35         | 190.03         | 199.86         | 14.3              | 23.2              | 724       |
| 9    | 4.00           | 1.66           | 2.58           | 52.28          | 175.63         | 8.89           | 54.2              | 25.6              | 691       |
| 10   | -3.63          | 1.31           | -2.50          | 129.39         | 1.53           | 176.77         | 80.7              | 29.8              | 614       |
| 11   | 3.44           | 3.79           | 2.73           | 0.00           | 0.00           | 180.00         | 141.5             | 25.3              | 580       |
| 12   | 3.22           | 4.75           | 1.91           | 73.79          | 169.29         | 202.84         | 0.2               | 19.6              | 542       |
| 13   | 3.06           | 0.08           | 5.62           | 261.46         | 198.25         | 186.61         | 4.8               | 20.8              | 533       |
| 14   | 3.60           | 1.96           | 1.44           | 79.09          | -4.39          | 191.52         | 19.2              | 11.3              | 523       |
| 15   | 3.80           | 5.28           | 0.15           | 96.15          | 9.29           | 197.67         | 13.0              | 20.3              | 514       |
| 16   | -3.58          | -2.06          | 4.39           | 287.04         | 18.88          | 163.29         | 0.2               | 19.6              | 513       |
| 17   | 3.53           | 2.24           | 1.79           | 69.62          | -3.07          | 188.99         | 48.6              | 11.5              | 493       |
| 18   | 3.11           | 3.80           | 3.04           | 1.64           | 166.47         | 182.99         | 145.8             | 23.5              | 490       |
| 19   | -3.75          | 5.35           | -0.19          | 76.47          | -10.48         | 20.36          | 30.0              | 22.6              | 470       |
| 20   | -3.76          | 5.33           | -0.18          | 257.01         | 190.30         | 199.99         | 25.9              | 22.4              | 469       |
| 21   | 3.71           | 5.49           | -0.28          | 77.65          | 190.42         | 21.51          | 27.4              | 22.4              | 459       |
| 22   | 3.73           | 5.44           | 0.27           | 100.71         | 370.09         | 200.66         | 17.0              | 22.0              | 451       |
| 23   | 3.07           | 5.84           | -0.15          | 91.43          | 168.66         | 184.34         | 39.1              | 14.7              | 440       |
| 24   | 3.11           | 5.78           | 0.29           | 266.35         | 190.91         | 187.92         | 43.0              | 14.8              | 433       |
| 25   | -4.17          | 0.62           | 4.43           | 258.10         | -0.01          | 168.81         | 62.5              | 16.0              | 419       |
| 26   | 3.27           | 4.95           | 1.53           | 256.32         | 191.05         | 177.42         | 57.1              | 15.4              | 416       |
| 27   | 3.21           | 3.13           | 3.20           | 223.95         | 190.67         | 180.21         | 19.2              | 15.9              | 414       |
| 28   | -3.27          | -1.26          | 1.69           | 98.35          | 169.38         | 1.06           | 26.0              | 13.7              | 370       |
| 29   | -4.16          | -0.24          | 5.09           | 268.48         | 3.31           | 168.72         | 35.5              | 13.5              | 362       |
| 30   | -3.46          | 0.98           | -0.07          | 87.96          | 174.54         | 11.11          | 8.3               | 17.8              | 353       |
| 31   | -4.11          | -0.83          | 5.04           | 84.18          | 171.57         | -10.83         | 33.4              | 12.7              | 349       |
| 32   | 3.41           | 1.43           | 4.86           | 90.20          | 179.20         | -0.63          | 124.8             | 19.6              | 316       |
| 33   | -2.93          | -2.03          | 0.90           | 278.11         | 199.53         | 11.77          | 17.3              | 16.6              | 315       |
| 34   | 2.90           | 0.47           | 5.38           | 291.12         | 15.54          | 166.12         | 23.9              | 16.1              | 307       |

<sup>a</sup> Translations in units of Ångström, rotations in units of degree, and energies in units of meV. <sup>b</sup> Davydov splitting  $\Delta E_{DS} = E(S^{**}) - E(S^*)$ . <sup>c</sup> Biexciton binding energy. <sup>d</sup>  $k_0 = 1.05 \times 10^8 \text{ s}^{-1}$ .

**Table S10.** Pair Structure Parameters for **1(C<sub>s</sub>)** Pairs 35-67.<sup>a</sup>

| Pair | T <sub>Z</sub> | T <sub>Y</sub> | T <sub>X</sub> | R <sub>Z</sub> | R <sub>Y</sub> | R <sub>X</sub> | $\Delta E_{DS}^b$ | $\Delta E_{BB}^c$ | $k/k_0^d$ |
|------|----------------|----------------|----------------|----------------|----------------|----------------|-------------------|-------------------|-----------|
| 35   | -3.30          | -1.15          | 0.73           | 275.61         | 188.26         | 9.10           | 8.2               | 19.1              | 285       |
| 36   | -3.12          | -2.72          | 3.45           | 124.23         | -12.07         | 202.59         | 49.8              | 6.4               | 284       |
| 37   | 3.56           | 1.49           | 1.55           | 98.12          | -0.33          | 193.66         | 128.8             | 24.5              | 273       |
| 38   | -3.04          | -1.50          | 0.07           | 89.41          | 167.50         | 10.08          | 6.7               | 14.3              | 271       |
| 39   | 3.36           | 4.65           | 1.86           | 57.63          | 173.78         | 4.43           | 12.3              | 10.8              | 267       |
| 40   | 3.47           | 1.22           | 2.88           | 114.16         | 174.33         | -2.63          | 144.2             | 17.0              | 259       |
| 41   | 3.92           | -0.07          | 2.71           | 86.54          | 172.27         | 5.95           | 32.6              | 11.2              | 260       |
| 42   | -3.94          | -0.07          | 3.74           | 223.22         | 6.24           | 172.99         | 0.7               | 11.5              | 240       |
| 43   | 3.50           | 1.96           | 2.33           | 111.63         | 178.16         | 0.44           | 207.6             | 27.5              | 231       |
| 44   | -3.59          | 3.09           | 0.06           | 97.40          | 187.06         | 182.56         | 30.0              | 11.6              | 230       |
| 45   | 3.93           | 0.11           | 4.48           | 70.51          | 180.01         | 7.40           | 51.2              | 11.1              | 225       |
| 46   | 4.21           | 0.34           | 3.95           | 49.03          | 181.57         | 11.91          | 19.9              | 9.9               | 225       |
| 47   | 3.51           | 2.90           | 0.03           | 94.88          | 175.27         | 184.43         | 19.4              | 16.4              | 225       |
| 48   | 2.89           | 3.29           | 3.63           | 33.59          | 158.18         | 1.40           | 4.6               | 10.1              | 200       |
| 49   | 3.60           | 3.16           | 1.00           | 56.90          | 173.88         | 170.84         | 133.9             | 10.8              | 197       |
| 50   | -4.15          | -0.10          | 4.26           | 22.52          | 168.35         | 192.30         | 18.0              | 8.4               | 197       |
| 51   | 4.45           | -0.43          | 3.57           | 38.74          | 193.12         | 13.42          | 0.7               | 9.8               | 198       |
| 52   | 4.61           | 1.61           | 3.56           | 0.51           | 15.34          | 187.17         | 62.2              | 7.4               | 195       |
| 53   | 3.57           | 3.04           | 0.44           | 79.52          | -3.23          | 186.61         | 58.4              | 11.4              | 189       |
| 54   | 2.95           | 1.76           | 3.22           | 17.98          | 163.39         | 193.11         | 168.9             | 12.6              | 185       |
| 55   | 3.30           | 3.24           | 1.70           | 60.86          | -8.24          | 9.63           | 28.3              | 13.8              | 184       |
| 56   | -3.22          | -2.63          | 0.31           | 80.82          | 163.21         | 182.02         | 74.1              | 14.4              | 184       |
| 57   | 2.95           | 1.77           | 3.66           | 11.47          | 165.00         | 193.41         | 135.4             | 7.9               | 180       |
| 58   | 4.23           | -0.22          | 2.32           | 98.76          | 174.64         | 162.08         | 17.0              | 10.4              | 173       |
| 59   | -3.93          | 1.58           | 1.25           | 76.81          | 181.24         | 180.50         | 57.1              | 7.2               | 171       |
| 60   | 3.87           | -1.26          | 4.51           | 219.23         | 186.83         | 171.71         | 47.6              | 12.4              | 169       |
| 61   | 3.86           | -1.08          | 1.16           | 98.56          | 182.06         | 201.14         | 45.2              | 8.7               | 162       |
| 62   | 3.11           | 2.52           | 3.55           | 167.54         | 11.46          | 13.12          | 154.5             | 16.0              | 162       |
| 63   | -3.67          | -0.29          | 2.61           | 267.64         | 3.17           | 176.29         | 4.9               | 10.6              | 158       |
| 64   | 3.86           | -0.90          | 1.18           | 98.04          | 181.66         | 195.69         | 39.8              | 9.5               | 157       |
| 65   | 3.76           | 2.61           | 1.11           | 90.81          | 4.34           | 198.15         | 77.5              | 7.1               | 156       |
| 66   | 3.98           | 1.84           | 4.02           | 0.00           | 0.00           | 180.00         | 70.6              | 5.9               | 155       |
| 67   | -2.53          | -2.76          | 0.22           | 83.85          | 336.55         | 186.79         | 67.4              | 9.4               | 154       |

<sup>a</sup> Translations in units of Ångström, rotations in units of degree, and energies in units of meV. <sup>b</sup> Davydov splitting  $\Delta E_{DS} = E(S^{**}) - E(S^*)$ . <sup>c</sup> Biexciton binding energy. <sup>d</sup>  $k_0 = 1.05 \times 10^8 \text{ s}^{-1}$ .

**Table S11.** Pair Structure Parameters for  $1(C_1)$  Pairs 1-34.<sup>a</sup>

| Pair | T <sub>Z</sub> | T <sub>Y</sub> | T <sub>X</sub> | R <sub>Z</sub> | R <sub>Y</sub> | R <sub>X</sub> | $\Delta E_{DS}^b$ | $\Delta E_{BB}^c$ | $k/k_0^d$ |
|------|----------------|----------------|----------------|----------------|----------------|----------------|-------------------|-------------------|-----------|
| 1    | -3.44          | 1.27           | 1.98           | 64.80          | 180.20         | -0.31          | 76.1              | 83.0              | 22252     |
| 2    | 3.45           | 1.25           | 2.00           | 63.74          | 179.86         | 0.22           | 83.0              | 81.6              | 20037     |
| 3    | 3.44           | 1.28           | 2.04           | 64.45          | -0.08          | -0.10          | 87.1              | 75.6              | 16130     |
| 4    | -3.45          | 1.28           | -2.02          | 115.52         | 0.09           | 179.85         | 99.5              | 72.4              | 13025     |
| 5    | 3.67           | 1.65           | -2.05          | 109.51         | 178.55         | 176.21         | 49.3              | 49.4              | 9267      |
| 6    | 3.94           | 1.85           | -2.01          | 106.24         | -1.80          | 188.05         | 42.0              | 33.1              | 4286      |
| 7    | -3.47          | 1.20           | 2.55           | 49.08          | 180.48         | -1.04          | 69.5              | 60.7              | 3148      |
| 8    | 3.47           | 1.16           | 2.53           | 48.00          | 179.58         | 0.94           | 78.3              | 60.4              | 2824      |
| 9    | 3.48           | -1.10          | 1.44           | 102.58         | -0.88          | 181.10         | 10.9              | 42.5              | 2724      |
| 10   | -3.48          | -1.11          | 1.45           | 102.66         | 0.90           | 178.87         | 11.7              | 43.5              | 2506      |
| 11   | -3.51          | 1.20           | -2.47          | 130.70         | 0.78           | 178.31         | 93.1              | 55.5              | 2284      |
| 12   | 3.68           | 1.36           | -2.46          | 130.21         | 177.46         | 175.70         | 85.1              | 53.1              | 2196      |
| 13   | -3.50          | 1.33           | -2.60          | -51.65         | -0.44          | 1.57           | 57.1              | 51.2              | 2049      |
| 14   | -3.39          | 0.00           | 5.40           | 86.64          | 182.09         | -0.30          | 33.5              | 31.1              | 1891      |
| 15   | 3.35           | -0.30          | 4.11           | 40.27          | 177.67         | -0.62          | 9.8               | 28.4              | 1855      |
| 16   | -3.45          | 1.37           | 0.79           | 80.62          | -0.32          | 179.51         | 0.5               | 32.5              | 1852      |
| 17   | 3.37           | 5.42           | 0.20           | 86.65          | 179.82         | 2.17           | 34.7              | 30.7              | 1818      |
| 18   | 3.36           | 5.43           | -0.18          | 92.91          | 179.81         | 177.60         | 46.5              | 31.4              | 1801      |
| 19   | 3.78           | -0.39          | -2.11          | 60.73          | 168.29         | 19.85          | 8.0               | 26.6              | 1778      |
| 20   | -3.52          | 2.82           | 2.81           | 40.83          | 177.39         | -1.19          | 13.2              | 26.6              | 1673      |
| 21   | 3.45           | 3.43           | 2.68           | 1.49           | 180.17         | 180.07         | 161.0             | 47.5              | 1658      |
| 22   | -3.35          | 5.44           | -0.29          | 98.55          | 180.99         | 182.25         | 33.1              | 29.1              | 1496      |
| 23   | -3.58          | 1.30           | 1.18           | 77.39          | 174.72         | 180.94         | 27.8              | 24.1              | 1433      |
| 24   | 3.94           | 1.66           | -2.60          | 127.14         | -4.13          | 188.29         | 62.1              | 34.7              | 1434      |
| 25   | -3.42          | 1.08           | 4.83           | 86.39          | 181.58         | 0.02           | 94.0              | 32.7              | 1334      |
| 26   | 3.43           | 1.08           | 4.83           | 86.30          | 178.42         | -0.01          | 93.5              | 31.9              | 1265      |
| 27   | 3.38           | 3.88           | -2.58          | 170.99         | 179.02         | -0.61          | 128.1             | 33.8              | 1291      |
| 28   | 3.53           | 3.73           | 2.63           | 2.05           | 2.47           | 181.11         | 131.0             | 33.2              | 1291      |
| 29   | 3.53           | 3.66           | 2.74           | -0.77          | 2.29           | 181.17         | 131.1             | 33.1              | 1287      |
| 30   | -3.43          | 1.08           | 4.86           | 86.58          | 1.81           | 0.01           | 99.4              | 31.3              | 1174      |
| 31   | -3.41          | -2.00          | 0.75           | 89.97          | -1.12          | 179.96         | 55.8              | 34.7              | 1066      |
| 32   | 3.47           | -0.66          | 2.12           | 92.21          | -0.48          | 179.48         | 36.0              | 27.8              | 982       |
| 33   | 3.43           | -0.59          | 3.84           | 215.46         | 181.37         | 179.53         | 21.2              | 23.6              | 968       |
| 34   | 3.88           | -0.47          | 1.69           | 96.50          | 166.68         | 2.33           | 14.5              | 22.7              | 903       |

<sup>a</sup> Translations in units of Ångström, rotations in units of degree, and energies in units of meV. <sup>b</sup> Davydov splitting  $\Delta E_{DS} = E(S^{**}) - E(S^*)$ . <sup>c</sup> Biexciton binding energy. <sup>d</sup>  $k_0 = 1.05 \times 10^8 \text{ s}^{-1}$ .

**Table S12.** Pair Structure Parameters for  $1(C_1)$  Pairs 35-67.<sup>a</sup>

| Pair | $T_z$ | $T_y$ | $T_x$ | $R_z$  | $R_y$  | $R_x$  | $\Delta E_{DS}^b$ | $\Delta E_{BB}^c$ | $k/k_0^d$ |
|------|-------|-------|-------|--------|--------|--------|-------------------|-------------------|-----------|
| 35   | -3.69 | -0.32 | 3.96  | 220.32 | 180.31 | 184.24 | 6.8               | 19.7              | 832       |
| 36   | -3.38 | 1.66  | 1.79  | 55.79  | 3.27   | 180.45 | 100.2             | 25.6              | 832       |
| 37   | -3.50 | -0.60 | -2.14 | 57.52  | 1.18   | 177.52 | 96.0              | 24.2              | 826       |
| 38   | -3.31 | 4.66  | 1.84  | 75.89  | 182.40 | 178.82 | 27.8              | 21.9              | 795       |
| 39   | -4.00 | 3.42  | -2.33 | 2.47   | 194.96 | 184.77 | 103.5             | 27.7              | 823       |
| 40   | 3.31  | 4.66  | -1.87 | 105.03 | 177.57 | -1.26  | 34.8              | 21.7              | 787       |
| 41   | -4.00 | -0.84 | 1.54  | 109.23 | 190.55 | 190.80 | 19.2              | 20.0              | 778       |
| 42   | 3.53  | 1.76  | 1.39  | 76.82  | 177.01 | 177.22 | 28.3              | 17.6              | 767       |
| 43   | 3.31  | 4.64  | 1.91  | 73.95  | 177.53 | 181.37 | 24.1              | 21.6              | 758       |
| 44   | -3.53 | 4.75  | -1.18 | 95.80  | 181.58 | 184.60 | 74.7              | 23.9              | 753       |
| 45   | -3.32 | 4.64  | -1.89 | 105.80 | 182.43 | 1.28   | 34.3              | 21.9              | 722       |
| 46   | 3.88  | -0.36 | -1.35 | 264.65 | 187.29 | 5.38   | 17.0              | 22.2              | 712       |
| 47   | -3.56 | -1.23 | -1.05 | 79.10  | -0.85  | -6.12  | 5.4               | 20.9              | 646       |
| 48   | -3.68 | -2.07 | -4.89 | 109.03 | 159.68 | 184.49 | 9.0               | 20.8              | 647       |
| 49   | 3.44  | 2.82  | -0.07 | 86.23  | 179.64 | -0.16  | 22.1              | 24.7              | 641       |
| 50   | 3.36  | 4.11  | -2.47 | 143.23 | 178.90 | 178.81 | 22.1              | 15.6              | 637       |
| 51   | 3.27  | 4.92  | 1.52  | 257.98 | 190.88 | 177.41 | 43.1              | 18.7              | 625       |
| 52   | -3.53 | -2.50 | -4.69 | 112.75 | 337.52 | 176.73 | 2.7               | 21.7              | 621       |
| 53   | 3.58  | 1.90  | -1.51 | 108.26 | 182.68 | 2.24   | 44.0              | 12.3              | 616       |
| 54   | 3.53  | -0.67 | 2.31  | 106.29 | 178.18 | -3.05  | 42.4              | 11.6              | 610       |
| 55   | -3.27 | 4.92  | -1.51 | 102.17 | 10.86  | 177.34 | 50.7              | 18.7              | 587       |
| 56   | -3.53 | 4.65  | -1.23 | 98.43  | 6.31   | 173.07 | 43.5              | 17.9              | 581       |
| 57   | -4.03 | 0.88  | -4.38 | 99.74  | 3.59   | 171.11 | 47.8              | 18.2              | 578       |
| 58   | 3.45  | 1.20  | -4.78 | 92.83  | -1.29  | 180.29 | 85.6              | 21.4              | 586       |
| 59   | -3.98 | -0.19 | -3.75 | 138.15 | 171.41 | 187.35 | 12.4              | 18.9              | 566       |
| 60   | -3.53 | -0.44 | 2.69  | 85.49  | 177.12 | -1.76  | 20.9              | 23.8              | 552       |
| 61   | -3.44 | 2.80  | 0.05  | 95.72  | 180.49 | 179.95 | 47.1              | 20.6              | 549       |
| 62   | -3.27 | 5.52  | 0.96  | 66.46  | 8.88   | 173.20 | 32.1              | 15.3              | 545       |
| 63   | -3.36 | 4.11  | -2.46 | 142.70 | 181.18 | 181.14 | 24.0              | 15.0              | 547       |
| 64   | 3.27  | 5.52  | -0.92 | 293.43 | 188.91 | 173.56 | 22.5              | 14.9              | 534       |
| 65   | 3.37  | 0.59  | 2.94  | 104.91 | 177.59 | -2.20  | 94.4              | 20.3              | 551       |
| 66   | -3.47 | -1.32 | 4.54  | 45.08  | 179.37 | -1.14  | 10.5              | 12.4              | 532       |
| 67   | -3.46 | -1.07 | 4.63  | 229.92 | 0.29   | 179.17 | 3.1               | 11.4              | 527       |

<sup>a</sup> Translations in units of Ångström, rotations in units of degree, and energies in units of meV. <sup>b</sup> Davydov splitting  $\Delta E_{DS} = E(S^{**}) - E(S^*)$ . <sup>c</sup> Biexciton binding energy. <sup>d</sup>  $k_0 = 1.05 \times 10^8 \text{ s}^{-1}$ .

#### 4. Optimized Geometries for Reorganization Energy Calculations

**Table S13.** XYZ Coordinates for Optimized Ground State of **1** in units of Ångström.

35

|   |            |            |            |
|---|------------|------------|------------|
| O | 0.0297399  | 0.0100260  | -0.0302392 |
| C | -0.3181500 | -4.1172971 | -0.4161545 |
| C | 3.8798596  | 2.4230274  | 0.0355755  |
| C | 0.7299928  | -4.9369186 | -0.0197967 |
| C | 3.6485269  | 0.0053403  | -0.0246503 |
| C | 4.4380495  | 1.1147193  | -0.0093507 |
| C | -0.1745180 | -2.7419799 | -0.4109166 |
| C | 1.9236312  | -4.3620133 | 0.3933202  |
| C | 2.5329507  | 2.6217906  | 0.0250725  |
| C | 2.0721871  | -2.9863464 | 0.4075434  |
| C | 1.6762903  | 1.4932971  | -0.0203652 |
| C | 1.1705131  | -0.7118144 | -0.0029452 |
| C | 2.2403393  | 0.1685874  | -0.0048747 |
| C | 1.0280344  | -2.1503645 | -0.0037252 |
| C | 0.3004609  | 1.3322136  | -0.0450977 |
| C | -1.7881501 | 4.4174047  | -0.4416432 |
| C | -3.0342330 | 3.9627609  | -0.0341553 |
| C | -3.1819333 | 2.6372899  | 0.3521195  |
| C | -2.0975424 | 1.7791392  | 0.3467747  |
| C | -0.8326002 | 2.2295993  | -0.0515671 |
| C | -0.7004608 | 3.5622608  | -0.4574416 |
| H | -1.2563005 | -4.5546342 | -0.7385777 |
| H | 4.5472663  | 3.2761317  | 0.0756605  |
| H | 0.6153761  | -6.0144550 | -0.0274299 |
| H | 4.0947725  | -0.9794124 | -0.0665383 |
| H | 5.5163686  | 1.0064854  | -0.0274290 |
| H | -0.9925480 | -2.1102825 | -0.7337337 |
| H | 2.7441159  | -4.9904321 | 0.7207483  |
| H | 2.1306696  | 3.6252684  | 0.0683283  |
| H | 2.9953040  | -2.5558549 | 0.7724576  |
| H | -1.6633557 | 5.4455330  | -0.7620529 |
| H | -3.8851272 | 4.6337287  | -0.0238665 |
| H | -4.1517323 | 2.2694063  | 0.6676577  |
| H | -2.2183748 | 0.7507262  | 0.6636005  |
| H | 0.2535419  | 3.9234108  | -0.8181068 |

**Table S14.** XYZ Coordinates for Optimized S<sub>1</sub> State of **1** in units of Ångström.

35

|   |            |            |            |
|---|------------|------------|------------|
| O | -0.0027080 | 0.0002502  | -0.0298401 |
| C | -0.4094857 | -4.0721449 | -0.1027314 |
| C | 3.9246067  | 2.4179098  | 0.0414391  |
| C | 0.6919129  | -4.9049039 | 0.0682186  |
| C | 3.6553347  | 0.0030077  | -0.0598584 |
| C | 4.4667530  | 1.1393890  | -0.0267214 |
| C | -0.2538151 | -2.7025815 | -0.1288774 |
| C | 1.9581250  | -4.3460977 | 0.2199159  |
| C | 2.5436027  | 2.6255009  | 0.0559483  |
| C | 2.1300296  | -2.9785733 | 0.1943771  |
| C | 1.7004850  | 1.4990133  | -0.0006172 |
| C | 1.1677660  | -0.7050179 | -0.0171372 |
| C | 2.2590013  | 0.1808273  | -0.0219546 |
| C | 1.0264961  | -2.1194250 | 0.0123541  |
| C | 0.3052574  | 1.3316577  | -0.0276092 |
| C | -1.7604372 | 4.4335772  | -0.2579100 |
| C | -3.0437661 | 3.9102698  | -0.1248456 |
| C | -3.2120517 | 2.5381787  | 0.0323193  |
| C | -2.1194638 | 1.6979724  | 0.0611498  |
| C | -0.8088463 | 2.2143744  | -0.0599258 |
| C | -0.6577327 | 3.6067395  | -0.2261037 |
| H | -1.3987869 | -4.5002995 | -0.2181531 |
| H | 4.5872227  | 3.2744924  | 0.0834781  |
| H | 0.5649327  | -5.9810367 | 0.0880325  |
| H | 4.1060927  | -0.9744598 | -0.1384376 |
| H | 5.5435483  | 1.0198594  | -0.0539781 |
| H | -1.1126626 | -2.0603172 | -0.2731001 |
| H | 2.8186242  | -4.9886831 | 0.3670197  |
| H | 2.1540678  | 3.6289204  | 0.1345385  |
| H | 3.1154365  | -2.5638704 | 0.3450799  |
| H | -1.6230709 | 5.5001492  | -0.3942936 |
| H | -3.9056628 | 4.5669117  | -0.1485290 |
| H | -4.2085064 | 2.1231235  | 0.1330147  |
| H | -2.2561622 | 0.6326708  | 0.1926883  |
| H | 0.3268279  | 4.0289574  | -0.3607499 |



**Table S15.** XYZ Coordinates for Optimized T<sub>1</sub> State of **1** in units of Ångström.

35

|   |            |            |            |
|---|------------|------------|------------|
| O | 0.0085100  | -0.0076850 | -0.2500771 |
| C | -0.4059972 | -4.0892663 | -0.0291888 |
| C | 3.8945546  | 2.4244312  | 0.3640092  |
| C | 0.7021778  | -4.9250794 | 0.0774295  |
| C | 3.5911318  | 0.0288253  | 0.4614221  |
| C | 4.4109063  | 1.1601476  | 0.5559158  |
| C | -0.2538597 | -2.7200608 | -0.0633736 |
| C | 1.9743330  | -4.3631311 | 0.1428855  |
| C | 2.5339032  | 2.6101926  | 0.0900472  |
| C | 2.1433736  | -2.9956603 | 0.1140102  |
| C | 1.7060040  | 1.5011436  | 0.0054788  |
| C | 1.1602668  | -0.7247088 | -0.0093960 |
| C | 2.2455680  | 0.1941494  | 0.1706176  |
| C | 1.0305187  | -2.1304363 | 0.0166833  |
| C | 0.3028927  | 1.3387381  | -0.2403456 |
| C | -1.7428548 | 4.4424914  | -0.5723482 |
| C | -2.9845518 | 3.9095518  | -0.9086134 |
| C | -3.1253341 | 2.5289456  | -1.0172937 |
| C | -2.0521618 | 1.6932198  | -0.7965391 |
| C | -0.7803438 | 2.2170193  | -0.4614428 |
| C | -0.6581379 | 3.6207015  | -0.3536666 |
| H | -1.4011278 | -4.5158841 | -0.0854063 |
| H | 4.5441420  | 3.2892686  | 0.4288999  |
| H | 0.5774392  | -6.0009527 | 0.1035877  |
| H | 4.0214502  | -0.9477102 | 0.6278886  |
| H | 5.4635710  | 1.0346945  | 0.7800589  |
| H | -1.1220871 | -2.0793853 | -0.1382142 |
| H | 2.8456484  | -5.0045184 | 0.2117453  |
| H | 2.1606036  | 3.6127242  | -0.0590382 |
| H | 3.1441807  | -2.5913011 | 0.1369811  |
| H | -1.6238508 | 5.5158026  | -0.4762091 |
| H | -3.8319329 | 4.5624856  | -1.0798821 |
| H | -4.0875651 | 2.1024743  | -1.2775155 |
| H | -2.1707004 | 0.6221906  | -0.8893532 |
| H | 0.2853168  | 4.0630330  | -0.0708618 |
